# Supplementary material for: Towards a Long-Term Strategy for Voluntary-Based Internal Radiation Contamination Monitoring: Representativeness of the Monitoring Results in Fukushima, Japan
Source: PubMed Central journal article supplement (PMC5486342; doi:10.3390/ijerph14060656), 2017-06-20
Supplement: ijerph-14-00656-s001.pdf [file ijerph-14-00656-s001.pdf]

# Supplementary Materials: Towards a Long-Term Strategy for Voluntary-Based Internal Radiation Contamination Monitoring: Representativeness of the Monitoring Results in Fukushima, Japan

**Table S1.** Regression models adopted to project the probability of Cs detection in whole population (odds ratio and 95% CI) for Cs-137 (the upper) and Cs-134 (the lower).

| Time Period                                                                                | Cs-137              |                     |                      |                      |                      |                      |
|--------------------------------------------------------------------------------------------|---------------------|---------------------|----------------------|----------------------|----------------------|----------------------|
|                                                                                            | Oct 2011            | Nov 2011            | Dec 2011             | Jan 2012             | Feb 2012             | Mar 2012 to Apr 2012 |
| Age group                                                                                  |                     |                     |                      |                      |                      |                      |
| 21–30                                                                                      | 0.66 (0.39–1.13)    | 0.55 (0.34–0.89)*   | 0.54 (0.33–0.90)*    | 0.53 (0.27–1.05)     | 0.39 (0.20–0.76)**   | 0.33 (0.14–0.75)**   |
| 31–40                                                                                      | 0.80 (0.50–1.27)    | 0.58 (0.40–0.85)**  | 0.53 (0.36–0.78)**   | 0.81 (0.46–1.41)     | 0.47 (0.25–0.85)*    | 0.30 (0.16–0.56)***  |
| 41–50                                                                                      | 0.72 (0.45–1.15)    | 0.68 (0.46–0.98)*   | 0.62 (0.42–0.91)*    | 0.71 (0.40–1.26)     | 0.49 (0.27–0.88)*    | 0.84 (0.48–1.48)     |
| 51–60                                                                                      | 0.94 (0.61–1.43)    | 1.01 (0.69–1.48)    | 0.76 (0.51–1.11)     | 0.83 (0.48–1.46)     | 0.69 (0.40–1.17)     | 0.85 (0.50–1.43)     |
| 61–70                                                                                      | 1.00                | 1.00                | 1.00                 | 1.00                 | 1.00                 | 1.00                 |
| 71–80                                                                                      | 1.25 (0.77–2.05)    | 1.11 (0.71–1.73)    | 1.21 (0.77–1.91)     | 2.45 (1.28–4.70)**   | 0.61 (0.28–1.29)     | 1.40 (0.79–2.47)     |
| 81–                                                                                        | 1.12 (0.55–2.29)    | 1.60 (0.75–3.41)    | 1.58 (0.72–3.47)     | 1.48 (0.50–4.40)     | 0.20 (0.02–1.77)     | 0.60 (0.16–2.28)     |
| Gender                                                                                     |                     |                     |                      |                      |                      |                      |
| Men                                                                                        | 1.00                | 1.00                | 1.00                 | 1.00                 | 1.00                 | 1.00                 |
| Women                                                                                      | 0.14 (0.11–0.19)*** | 0.18 (0.14–0.23)*** | 0.18 (0.14–0.23)***  | 0.11 (0.07–0.16)***  | 0.12 (0.08–0.17)***  | 0.17 (0.11–0.25)***  |
| Post-incident actual lived-at address                                                      |                     |                     |                      |                      |                      |                      |
| Inside Minamisoma City                                                                     | 1.00                | 1.00                | 1.00                 | 1.00                 | 1.00                 | 1.00                 |
| Outside Minamisoma City but inside Fukushima Prefecture                                    | 0.97 (0.69–1.36)    | 0.96 (0.69–1.32)    | 1.28 (0.86–1.90)     | 0.58 (0.33–1.01)     | 0.89 (0.58–1.38)     | 1.51 (0.91–2.52)     |
| Neighboring prefectures of Fukushima                                                       | 0.51 (0.31–0.83)**  | 0.73 (0.47–1.13)    | 0.34 (0.19–0.62)***  | 0.61 (0.34–1.11)     | 0.57 (0.32–1.03)     | 0.65 (0.35–1.22)     |
| Outside the neighboring prefectures                                                        | 0.71 (0.26–1.92)    | 0.28 (0.09–0.83)*   | 0.54 (0.16–1.79)     | 0.41 (0.16–1.05)     | 0.19 (0.06–0.56)**   | 0.36 (0.12–1.10)     |
| Air dose rate ( $\mu\text{Sv/h}$ ) as of 29 April 2011 at pre-incident residential address | 1.05 (0.97–1.13)    | 1.30 (1.23–1.37)*** | 1.15 (1.00–1.32)     | 1.24 (1.10–1.38)***  | 1.15 (1.07–1.24)***  | 1.16 (1.04–1.28)**   |
| Time Period                                                                                | May 2012            | Jun 2012            | Jul 2012 to Aug 2012 | Sep 2012 to Mar 2013 | Apr 2013 to Mar 2015 |                      |
| Age group                                                                                  |                     |                     |                      |                      |                      |                      |
| 21–30                                                                                      | 0.20 (0.06–0.71)*   | 0.29 (0.07–1.29)    | 0.06 (0.01–0.41)**   | 0.53 (0.24–1.16)     | 0.27 (0.08–0.87)*    |                      |
| 31–40                                                                                      | 0.32 (0.17–0.62)**  | 0.70 (0.31–1.58)    | 0.47 (0.25–0.88)*    | 0.33 (0.16–0.68)**   | 0.23 (0.09–0.57)**   |                      |
| 41–50                                                                                      | 0.44 (0.22–0.89)*   | 0.78 (0.35–1.74)    | 0.58 (0.32–1.03)     | 0.24 (0.11–0.54)**   | 0.33 (0.16–0.69)**   |                      |
| 51–60                                                                                      | 0.61 (0.35–1.06)    | 0.74 (0.38–1.43)    | 0.90 (0.58–1.40)     | 0.56 (0.34–0.91)*    | 0.41 (0.24–0.71)**   |                      |
| 61–70                                                                                      | 1.00                | 1.00                | 1.00                 | 1.00                 | 1.00                 |                      |
| 71–80                                                                                      | 0.94 (0.57–1.55)    | 1.52 (0.87–2.65)    | 1.30 (0.84–2.01)     | 1.50 (0.97–2.30)     | 1.54 (1.07–2.20)*    |                      |
| 81–                                                                                        | 0.34 (0.10–1.22)    | 3.80 (1.60–9.01)**  | 1.64 (0.86–3.13)     | 2.91 (1.62–5.20)***  | 0.95 (0.49–1.83)     |                      |
| Gender                                                                                     |                     |                     |                      |                      |                      |                      |
| Men                                                                                        | 1.00                | 1.00                | 1.00                 | 1.00                 | 1.00                 |                      |
| Women                                                                                      | 0.13 (0.09–0.20)*** | 0.08 (0.05–0.14)*** | 0.12 (0.08–0.18)***  | 0.22 (0.15–0.31)***  | 0.32 (0.23–0.45)***  |                      |
| Post-incident actual lived-at address                                                      |                     |                     |                      |                      |                      |                      |
| Inside Minamisoma City                                                                     | 1.00                | 1.00                | 1.00                 | 1.00                 | 1.00                 |                      |
| Outside Minamisoma City but inside Fukushima Prefecture                                    | 0.23 (0.05–1.00)    | 0.69 (0.26–1.84)    | 0.63 (0.29–1.35)     | 0.79 (0.42–1.47)     | 0.78 (0.39–1.57)     |                      |

|                                                                               |                     |                     |                             |                             |                             |                             |
|-------------------------------------------------------------------------------|---------------------|---------------------|-----------------------------|-----------------------------|-----------------------------|-----------------------------|
| Neighboring prefectures of Fukushima                                          | 0.57 (0.21–1.54)    | 0.56 (0.16–1.94)    | 0.88 (0.37–2.12)            | 0.20 (0.05–0.81)*           | 0.11 (0.02–0.82)*           |                             |
| Outside the neighboring prefectures                                           | 0.21 (0.03–1.64)    | 1.05 (0.22–5.06)    | 0.27 (0.04–2.03)            | 0.37 (0.09–1.53)            | NA                          |                             |
| Air dose rate (μSv/h) as of 29 April 2011 at pre-incident residential address | 1.19 (0.90–1.57)    | 1.13 (0.93–1.36)    | 1.14 (1.01–1.28)*           | 1.14 (1.04–1.26)**          | 1.23 (1.16–1.31)***         |                             |
| <b>Cs-134</b>                                                                 |                     |                     |                             |                             |                             |                             |
| <b>Time period</b>                                                            | <b>Oct 2011</b>     | <b>Nov 2011</b>     | <b>Dec 2011</b>             | <b>Jan 2012</b>             | <b>Feb 2012</b>             | <b>Mar 2012 to Apr 2012</b> |
| Age group                                                                     |                     |                     |                             |                             |                             |                             |
| 21–30                                                                         | 0.67 (0.38–1.17)    | 0.49 (0.30–0.80)**  | 0.53 (0.33–0.87)*           | 0.38 (0.18–0.81)*           | 0.31 (0.15–0.67)**          | 0.22 (0.08–0.59)**          |
| 31–40                                                                         | 0.80 (0.50–1.29)    | 0.42 (0.28–0.62)*** | 0.57 (0.39–0.83)**          | 0.62 (0.34–1.12)            | 0.43 (0.22–0.84)*           | 0.28 (0.14–0.56)***         |
| 41–50                                                                         | 0.56 (0.35–0.89)*   | 0.59 (0.40–0.86)**  | 0.60 (0.41–0.87)**          | 0.65 (0.36–1.19)            | 0.33 (0.16–0.66)**          | 0.39 (0.20–0.79)**          |
| 51–60                                                                         | 1.06 (0.69–1.63)    | 0.90 (0.61–1.33)    | 0.77 (0.53–1.12)            | 0.94 (0.53–1.68)            | 0.57 (0.31–1.05)            | 0.61 (0.35–1.09)            |
| 61–70                                                                         | 1.00                | 1.00                | 1.00                        | 1.00                        | 1.00                        | 1.00                        |
| 71–80                                                                         | 1.26 (0.77–2.06)    | 0.89 (0.57–1.41)    | 1.52 (0.97–2.37)            | 2.03 (1.04–3.98)*           | 0.48 (0.20–1.17)            | 1.12 (0.61–2.03)            |
| 81–                                                                           | 1.12 (0.55–2.28)    | 1.23 (0.57–2.67)    | 1.05 (0.48–2.32)            | 1.60 (0.53–4.77)            | 0.31 (0.03–3.19)            | 0.43 (0.09–2.01)            |
| Gender                                                                        |                     |                     |                             |                             |                             |                             |
| Men                                                                           | 1.00                | 1.00                | 1.00                        | 1.00                        | 1.00                        | 1.00                        |
| Women                                                                         | 0.12 (0.09–0.17)*** | 0.17 (0.13–0.22)*** | 0.19 (0.15–0.25)***         | 0.11 (0.07–0.16)***         | 0.09 (0.05–0.15)***         | 0.14 (0.09–0.23)***         |
| Post-incident actual lived-at address                                         |                     |                     |                             |                             |                             |                             |
| Inside Minamisoma City                                                        | 1.00                | 1.00                | 1.00                        | 1.00                        | 1.00                        | 1.00                        |
| Outside Minamisoma City but inside Fukushima Prefecture                       | 1.09 (0.76–1.56)    | 1.11 (0.80–1.54)    | 0.74 (0.50–1.11)            | 0.61 (0.34–1.11)            | 1.09 (0.66–1.78)            | 1.74 (0.99–3.06)            |
| Neighboring prefectures of Fukushima                                          | 0.59 (0.36–0.99)*   | 0.58 (0.36–0.94)*   | 0.26 (0.15–0.48)***         | 0.45 (0.23–0.90)*           | 0.72 (0.37–1.43)            | 0.44 (0.19–1.01)            |
| Outside the neighboring prefectures                                           | 0.33 (0.12–0.97)*   | 0.34 (0.11–1.03)    | 0.56 (0.19–1.62)            | 0.29 (0.10–0.90)*           | 0.13 (0.03–0.58)**          | 0.26 (0.06–1.16)            |
| Air dose rate (μSv/h) as of 29 April 2011 at pre-incident residential address | 1.11 (1.00–1.22)*   | 1.30 (1.20–1.41)*** | 1.01 (0.87–1.17)            | 1.23 (1.09–1.39)**          | 1.19 (1.07–1.32)**          | 1.10 (0.98–1.23)            |
| <b>Time period</b>                                                            | <b>May 2012</b>     | <b>Jun 2012</b>     | <b>Jul 2012 to Aug 2012</b> | <b>Sep 2012 to Mar 2013</b> | <b>Apr 2013 to Mar 2015</b> |                             |
| Age group                                                                     |                     |                     |                             |                             |                             |                             |
| 21–30                                                                         | 0.11 (0.01–0.85)*   | 0.25 (0.03–1.94)    | 0.44 (0.17–1.14)            | 0.10 (0.01–0.77)*           | 0.23 (0.03–1.66)            |                             |
| 31–40                                                                         | 0.26 (0.11–0.61)**  | 0.52 (0.17–1.58)    | 0.10 (0.02–0.40)**          | 0.36 (0.15–0.87)*           | 0.23 (0.05–0.97)*           |                             |
| 41–50                                                                         | 0.31 (0.12–0.78)*   | 0.53 (0.18–1.61)    | 0.63 (0.33–1.20)            | 0.35 (0.14–0.85)*           | 0.10 (0.01–0.74)*           |                             |
| 51–60                                                                         | 0.49 (0.25–0.96)*   | 0.95 (0.45–2.00)    | 0.96 (0.59–1.58)            | 0.59 (0.32–1.07)            | 0.19 (0.06–0.62)**          |                             |
| 61–70                                                                         | 1.00                | 1.00                | 1.00                        | 1.00                        | 1.00                        |                             |
| 71–80                                                                         | 1.01 (0.57–1.79)    | 1.40 (0.72–2.70)    | 1.45 (0.90–2.34)            | 1.62 (0.96–2.72)            | 1.39 (0.80–2.41)            |                             |
| 81–                                                                           | NA                  | 2.52 (0.90–7.06)    | 1.50 (0.72–3.12)            | 2.02 (0.95–4.29)            | 0.77 (0.27–2.25)            |                             |
| Gender                                                                        |                     |                     |                             |                             |                             |                             |
| Men                                                                           | 1.00                | 1.00                | 1.00                        | 1.00                        | 1.00                        |                             |
| Women                                                                         | 0.16 (0.09–0.27)*** | 0.09 (0.04–0.18)*** | 0.25 (0.17–0.37)***         | 0.49 (0.32–0.73)**          | 0.31 (0.18–0.54)***         |                             |
| Post-incident actual lived-at address                                         |                     |                     |                             |                             |                             |                             |
| Inside Minamisoma City                                                        | 1.00                | 1.00                | 1.00                        | 1.00                        | 1.00                        |                             |
| Outside Minamisoma City but inside Fukushima Prefecture                       | 0.55 (0.12–2.49)    | 0.44 (0.10–1.89)    | 0.58 (0.23–1.46)            | 0.95 (0.44–2.02)            | NA                          |                             |
| Neighboring prefectures of Fukushima                                          | 0.20 (0.03–1.48)    | 0.32 (0.04–2.45)    | 1.06 (0.42–2.69)            | 0.82 (0.29–2.33)            | NA                          |                             |
| Outside the neighboring prefectures                                           | 0.42 (0.05–3.31)    | 0.93 (0.11–7.51)    | 0.79 (0.19–3.37)            | 1.06 (0.32–3.52)            | NA                          |                             |
| Air dose rate (μSv/h) as of 29 April 2011 at pre-incident residential address | 1.11 (0.81–1.52)    | 1.05 (0.83–1.34)    | 1.16 (1.04–1.29)**          | 1.21 (1.09–1.34)***         | 1.23 (1.12–1.36)***         |                             |

Note: \* p<0.05, \*\*<0.01, \*\*\*<0.001. Variables in the tables were mutually adjusted. Pre-incident residential address was also adjusted as a random effect. NA indicates no detected individuals.
